# Supplementary material for: Child nutritional status as screening tool for identifying undernourished mothers: an observational study of mother–child dyads in Mogadishu, Somalia, from November 2019 to March 2020
Source: HighWire-hosted journal article supplement (doi:10.1136/bmjnph-2021-000302), 2021-12-01
Supplement: bmjnph-2021-000302supp001_data_supplement.pdf [file bmjnph-2021-000302supp001_data_supplement.pdf]

Supplemental Table 1: Demographic characteristics and nutritional status of mothers less than 19 years presenting to Shabelle Health and Nutrition Center, Somalia – November 2019 to March 2020 (N=133)

|                                                          | Pregnant Mothers <sup>1</sup> | Lactating Mothers <sup>2</sup> | Neither Pregnant nor Lactating Mothers <sup>3</sup> | All Mothers |
|----------------------------------------------------------|-------------------------------|--------------------------------|-----------------------------------------------------|-------------|
|                                                          | (15 – 18.9 years)             |                                |                                                     |             |
| <b>N</b>                                                 | 31                            | 5                              | 97                                                  | 133         |
| <b>Age (years)</b>                                       |                               |                                |                                                     |             |
| Median (IQR)                                             | 18 (18-18)                    | 18 (18-18)                     | 18 (18-18)                                          | 18 (18-18)  |
| Range                                                    | 17-18                         | 18                             | 15-18                                               | 15-18       |
| <b>Access to care</b>                                    |                               |                                |                                                     |             |
| Enrolled in antenatal care <sup>4</sup> , n(%)           | 28 (90.3)                     | 5 (100)                        | -                                                   | 33 (91.7)   |
| <b>Nutritional Status</b>                                |                               |                                |                                                     |             |
| MUAC <sup>5</sup> (cm), mean (SD)                        | 24.6 (3.69)                   | 23.1 (2.80)                    | 24.1 (2.99)                                         | 24.2 (3.16) |
| Low Mother MUAC <sup>5,6</sup> , n(%)                    | 10 (32.3)                     | 3 (60.0)                       | 48 (51.1)                                           | -           |
| Body mass index for age z-score <sup>7</sup> , mean (SD) | 0.64 (0.99)                   | -0.14 (1.09)                   | -0.12 (1.34)                                        | 0.06 (1.29) |
| Body mass index for age z-score <sup>7</sup> < -2, n(%)  | 0 (0.00)                      | 0 (0.00)                       | 5 (5.20)                                            | 5 (3.80)    |
| Body mass index for age z-score <sup>7</sup> < -3, n(%)  | 0 (0.00)                      | 0 (0.00)                       | 2 (0.02)                                            | 2 (0.02)    |
| <b>Parity, n(%)</b>                                      |                               |                                |                                                     |             |
| 1-2 child                                                | 21 (67.7)                     | 2 (40.0)                       | 81 (83.5)                                           | 104 (78.2)  |
| 3-5 children                                             | 9 (29.0)                      | 3 (60.0)                       | 14 (14.4)                                           | 26 (19.5)   |
| >5 children                                              | 1 (3.20)                      | 0 (0.00)                       | 2 (2.10)                                            | 3 (2.3)     |

Abbreviations: Mid-upper arm circumference (MUAC), kilograms (kg), meters (m), centimeters (cm), standard deviation (SD)

<sup>1</sup>Pregnant mothers defined as mothers that self-identified as pregnant. Pregnant mothers may have also been breastfeeding a child.

<sup>2</sup>Lactating mothers defined as non-pregnant mothers breastfeeding a child between the ages of 0-5 months. The child enrolled in the study was not necessarily the child who was breastfeeding.

<sup>3</sup>Neither pregnant nor lactating mothers defined as women who were neither pregnant nor lactating a child 0-5 months.

<sup>4</sup>Denominator of women in all mothers column only includes pregnant and lactating mothers (n=36)

<sup>5</sup>Due to missing MUAC data or MUAC out of range 3 mothers were excluded from this analysis. The sample for neither pregnant nor lactating mothers n=94.

<sup>6</sup>Low MUAC defined as <23 cm for pregnant and lactating mothers and ≤24 cm for neither pregnant nor lactating mothers.

<sup>7</sup>Due to missing weight or height information or BMI values out of range, 1 mother was excluded from this analysis. The sample for neither pregnant nor lactating mothers n=96.

Supplemental Table 2: Model estimated differences in maternal BMI and MUAC by maternal parity, gestational status and age

|                                             |                          | Model 1 – Model Estimated Maternal BMI based on child WHZ <sup>1</sup> |      |      | Model 2 - Model Estimated Maternal BMI based on child MUAC <sup>1</sup> |      |      | Model 3 - Model Estimated Maternal MUAC based on child MUAC <sup>1</sup> |      |      | Model 4 - Model Estimated Maternal MUAC based on child WHZ <sup>1</sup> |      |      |
|---------------------------------------------|--------------------------|------------------------------------------------------------------------|------|------|-------------------------------------------------------------------------|------|------|--------------------------------------------------------------------------|------|------|-------------------------------------------------------------------------|------|------|
|                                             |                          | Age of mother (years)                                                  |      |      | Age of mother (years)                                                   |      |      | Age of mother (years)                                                    |      |      | Age of mother (years)                                                   |      |      |
| Maternal Gestational Status                 | Maternal Parity Category | 22                                                                     | 27   | 30   | 22                                                                      | 27   | 30   | 22                                                                       | 27   | 30   | 22                                                                      | 27   | 30   |
| Neither pregnant nor lactating <sup>2</sup> | 1 to 2                   | Ref                                                                    | Ref  | Ref  | Ref                                                                     | Ref  | Ref  | Ref                                                                      | Ref  | Ref  | Ref                                                                     | Ref  | Ref  |
|                                             | 3 to 5                   | 1.45                                                                   | 0.52 | 0.58 | 1.56                                                                    | 1.92 | 2.13 | 0.67                                                                     | 0.83 | 0.92 | 1.12                                                                    | 1.37 | 1.52 |
|                                             | 6 to 15                  | 2.04                                                                   | 0.73 | 0.81 | 2.14                                                                    | 2.62 | 2.92 | 1.00                                                                     | 1.22 | 1.36 | 1.47                                                                    | 1.81 | 2.01 |
| Lactating <sup>3</sup>                      | 1 to 2                   | Ref                                                                    | Ref  | Ref  | Ref                                                                     | Ref  | Ref  | Ref                                                                      | Ref  | Ref  | Ref                                                                     | Ref  | Ref  |
|                                             | 3 to 5                   | 2.36                                                                   | 1.64 | 1.82 | 2.42                                                                    | 2.96 | 3.29 | 1.31                                                                     | 1.61 | 1.79 | 1.76                                                                    | 2.16 | 2.40 |
|                                             | 6 to 15                  | 3.13                                                                   | 1.94 | 2.15 | 2.96                                                                    | 3.63 | 4.03 | 1.58                                                                     | 1.95 | 2.16 | 2.55                                                                    | 3.14 | 3.48 |
| Pregnant <sup>4</sup>                       | 1 to 2                   | Ref                                                                    | Ref  | Ref  | Ref                                                                     | Ref  | Ref  | Ref                                                                      | Ref  | Ref  | Ref                                                                     | Ref  | Ref  |
|                                             | 3 to 5                   | 1.38                                                                   | 0.29 | 0.33 | 1.13                                                                    | 1.39 | 1.54 | 0.59                                                                     | 0.72 | 0.80 | 0.96                                                                    | 1.18 | 1.31 |
|                                             | 6 to 15                  | 2.35                                                                   | 3.35 | 4.35 | 2.22                                                                    | 2.73 | 3.03 | 1.42                                                                     | 1.74 | 1.93 | 1.80                                                                    | 2.21 | 2.46 |

Abbreviations: Ref = Reference, BMI=Body Mass Index, MUAC = Mid-upper arm circumference, WHZ = weight for height z-score

<sup>1</sup>Models adjusted for maternal parity, gestational status and age in addition to child nutritional indicator.

<sup>2</sup>Neither pregnant nor lactating mothers defined as women who were neither pregnant nor lactating a child 0-5 months.

<sup>3</sup>Lactating mothers defined as non-pregnant mothers breastfeeding a child between the ages of 0-5 months. The child enrolled in the study was not necessarily the child who was breastfeeding.

<sup>4</sup>Pregnant mothers defined as mothers that self-identified as pregnant. Pregnant mothers may have also been breastfeeding a child.

Supplemental Table 3: Model estimated differences in maternal BMI and MUAC by maternal parity, gestational status and age

|                                          |                          | Model 1 – Model Estimated Maternal BMI based on child WHZ <sup>1</sup> |       |       | Model 2 - Model Estimated Maternal BMI based on child MUAC <sup>1</sup> |       |       | Model 3 - Model Estimated Maternal MUAC based on child MUAC <sup>1</sup> |       |       | Model 4 - Model Estimated Maternal MUAC based on child WHZ <sup>1</sup> |       |       |
|------------------------------------------|--------------------------|------------------------------------------------------------------------|-------|-------|-------------------------------------------------------------------------|-------|-------|--------------------------------------------------------------------------|-------|-------|-------------------------------------------------------------------------|-------|-------|
|                                          |                          | Age of mother (years)                                                  |       |       | Age of mother (years)                                                   |       |       | Age of mother (years)                                                    |       |       | Age of mother (years)                                                   |       |       |
| Maternal Gestational Status <sup>2</sup> | Maternal Parity Category | 22                                                                     | 27    | 30    | 22                                                                      | 27    | 30    | 22                                                                       | 27    | 30    | 22                                                                      | 27    | 30    |
| Neither                                  | 1 to 2 children          | Ref                                                                    | Ref   | Ref   | Ref                                                                     | Ref   | Ref   | Ref                                                                      | Ref   | Ref   | Ref                                                                     | Ref   | Ref   |
| Lactating                                |                          | -1.33                                                                  | -2.89 | -3.21 | -1.37                                                                   | -1.68 | -1.87 | -0.67                                                                    | -0.82 | -0.91 | -1.02                                                                   | -1.25 | -1.38 |
| Pregnant                                 |                          | 0.24                                                                   | 0.95  | 1.06  | 0.49                                                                    | 0.60  | 0.67  | -0.46                                                                    | -0.56 | -0.63 | -0.57                                                                   | -0.70 | -0.77 |
| Neither                                  | 3 to 5 children          | Ref                                                                    | Ref   | Ref   | Ref                                                                     | Ref   | Ref   | Ref                                                                      | Ref   | Ref   | Ref                                                                     | Ref   | Ref   |
| Lactating                                |                          | -0.43                                                                  | -1.78 | -1.98 | -0.52                                                                   | -0.64 | -0.71 | -0.03                                                                    | -0.04 | -0.04 | -0.37                                                                   | -0.46 | -0.51 |
| Pregnant                                 |                          | 0.17                                                                   | 0.72  | 0.80  | 0.06                                                                    | 0.07  | 0.08  | -0.55                                                                    | -0.67 | -0.74 | -0.72                                                                   | -0.88 | -0.98 |
| Neither                                  | 6 to 15 children         | Ref                                                                    | Ref   | Ref   | Ref                                                                     | Ref   | Ref   | Ref                                                                      | Ref   | Ref   | Ref                                                                     | Ref   | Ref   |
| Lactating                                |                          | -0.24                                                                  | -1.69 | -1.88 | -0.55                                                                   | -0.68 | -0.75 | -0.08                                                                    | -0.10 | -0.11 | 0.06                                                                    | 0.08  | 0.09  |
| Pregnant                                 |                          | 0.58                                                                   | 1.23  | 1.37  | 0.57                                                                    | 0.70  | 0.78  | -0.04                                                                    | -0.05 | -0.05 | -0.24                                                                   | -0.29 | -0.33 |

Abbreviations: Ref = Reference, BMI=Body Mass Index, MUAC = Mid-upper arm circumference, WHZ = weight for height z-score

<sup>1</sup>Models adjusted for maternal parity, gestational status and age in addition to child nutritional indicator.

<sup>2</sup>Neither pregnant nor lactating mothers defined as women who were neither pregnant nor lactating a child 0-5 months.

<sup>3</sup>Lactating mothers defined as non-pregnant mothers breastfeeding a child between the ages of 0-5 months. The child enrolled in the study was not necessarily the child who was breastfeeding.

<sup>4</sup>Pregnant mothers defined as mothers that self-identified as pregnant. Pregnant mothers may have also been breastfeeding a child.

Supplemental Figure 1: Flowchart showing exclusion criteria for mother-child dyads during statistical analyses

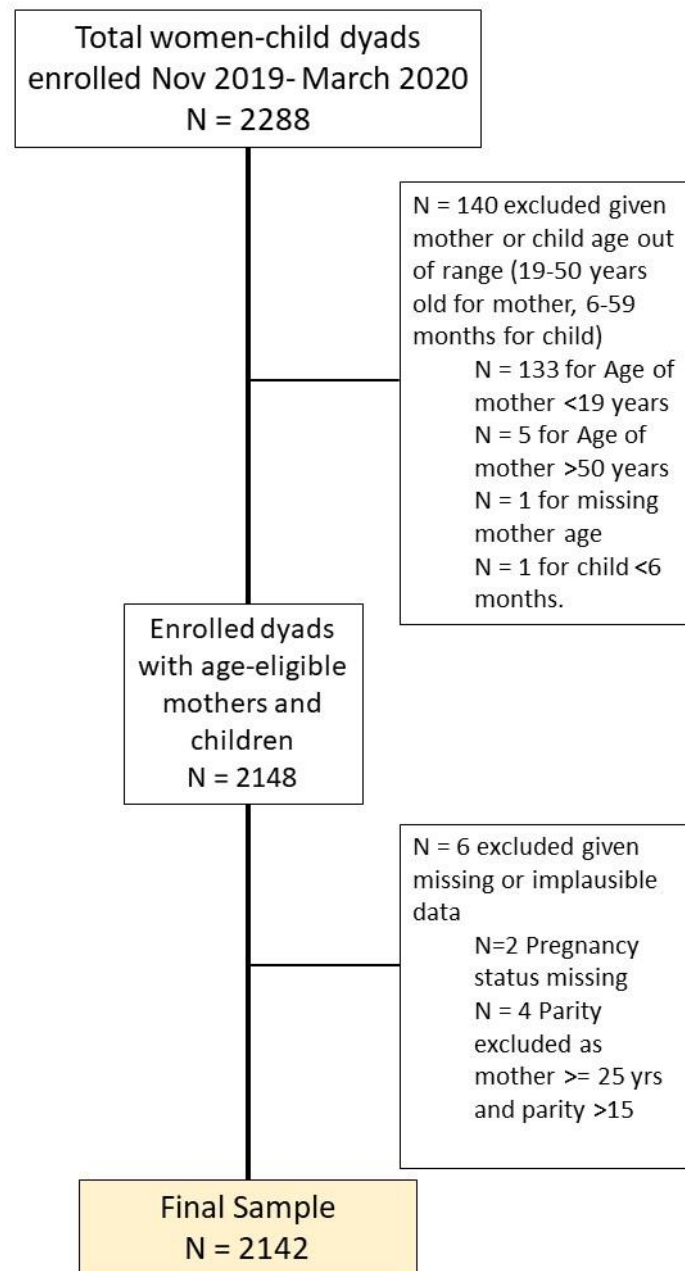

Final sample – 98.9% (2119/2142) subset with complete data on maternal BMI

Final sample – 96.4% (2064/2142) subset with complete data on maternal MUAC

Final sample – 98.3% (2106/2142) subset with complete data on WHZ

Final sample – 99.9% (2140/2142) subset with complete data on child MUAC
